# Supplementary material for: Clinical activity and tolerability of FOLFIRI and cetuximab in elderly patients with metastatic colorectal cancer in the CAPRI-GOIM first-line trial
Source: PubMed Central journal article supplement — ESMO Open. 2017 Feb 20;1(6):e000086. doi: 10.1136/esmoopen-2016-000086 (PMC5548975; doi:10.1136/esmoopen-2016-000086), 2017-02-20
Supplement: esmoopen-2016-000086supp001.pdf [file esmoopen-2016-000086supp001.pdf]

Supplementary table 1

| Age | ITT population<br>n = 340 | %    | NGS cohort<br>n = 182 | %    | KRAS/NRAS/BRAF/PIK3CA WT<br>n = 104 | %    |
|-----|---------------------------|------|-----------------------|------|-------------------------------------|------|
| <65 | 186                       | 54.7 | 95                    | 52.2 | 53                                  | 51.0 |
| ≥65 | 154                       | 45.3 | 87                    | 47.8 | 51                                  | 49.0 |
| <70 | 254                       | 74.7 | 136                   | 74.7 | 75                                  | 72.1 |
| ≥70 | 86                        | 25.3 | 46                    | 25.3 | 29                                  | 27.8 |
| <75 | 305                       | 89.7 | 165                   | 90.7 | 95                                  | 91.4 |
| ≥75 | 35                        | 10.3 | 17                    | 9.3  | 9                                   | 8.6  |
